# Supplementary material for: In silico analysis of the Mus musculus uterine gene expression landscape during pregnancy identifies putative upstream regulators for labour
Source: PubMed Central journal article supplement (PMC6147639; doi:10.1371/journal.pone.0204236), 2018-09-20

# Optimal number of clusters

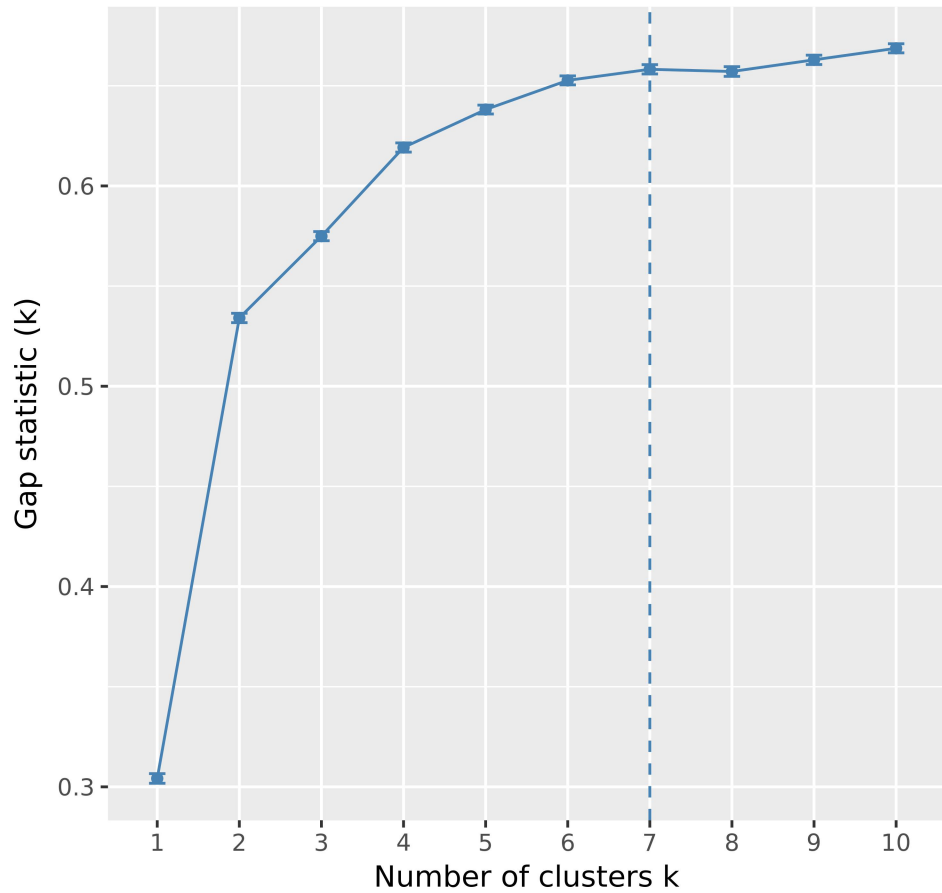

Supplement: pone.0204236.s006.pdf [file pone.0204236.s006.pdf]
